# Supplementary material
Source: MDPI journal article supplement (https://www.mdpi.com/2075-163X/13/11/1454)
Supplement: s1 [file s1]

Archive with 2 entries (2 files):
- ReminingExamples_final.pdf
- TRI.USGS.data_Table.3.xlsx
