# Supplementary material
Source: MDPI journal article supplement (https://www.mdpi.com/2075-163X/13/11/1454)
Supplement: s1 [file s1 › TRI.USGS.data_Table.3.xlsx]

## Sheet: TRI.USGS.data
Table 3. Total TRI amounts disposed or released onsite and offsite compared to apparent U.S. consumption
Chemical	Total TRI Disposal or Other Releases, Metal Mines, 2021 (lbs)	Total TRI Disposal or Other Releases, Metal Mines, 2021 (tonnes)	Total TRI Disposal or Other Releases, Metal Mines, 1998-2021 (lbs)	Total TRI Disposal or Other Releases, Metal Mines, 1998-2021 (tonnes)	Total for 1998-2021, using 0.5*compounds (tonnes)	Total for 2021, using 0.5*compounds (tonnes)	Total TRI Disposal or Other Releases, Metal Mines, 1998-2021 (tonnes)	Footnote	Total for 2021, using 0.5*compounds (tonnes)	USGS, 2023; annual apparent consumption for 2022 (tonnes)	Net import reliance (% of apparent consumption)	% of annual consumption supplied by 2021 mine waste using 0.5*compounds	% of annual consumption supplied by 1998-2021 mine waste using 0.5*compounds
Antimony	0	0	1732663	785.923			785.923	a		27000	83
Antimony compounds	4768616	2163.01	247242532	112147	56859.6	1081.5	112147		56859.6			4.00557	210.591
Chromium	2259821	1025.04	78094452	35423.1			35423.1			590000	83
Chromium compounds	8258183	3745.85	352066722	159695	115270	2897.96	159695		115270			0.49118	19.5374
Cobalt	219395	99.5159	562467	255.131			255.131	b		7800	76
Cobalt compounds	1464978	664.503	65505697	29712.9	15111.6	431.767	29712.9		15111.6			5.53548	193.738
Copper	171699	77.8814	292623782	132732			132732			1900000	41
Copper compounds	107221140	48634.7	6257126200	2.83819e+06	1.55182e+06	24395.2	2.83819e+06		1.55182e+06			1.28396	81.675
Manganese	669483	303.672	76789716	34831.2			34831.2			890000	100
Manganese compounds	114713628	52033.2	2168287718	983519	526591	26320.3	983519		526591			2.95734	59.1675
Nickel	682422	309.542	22812865	10347.7			10347.7			220000	56
Nickel compounds	11806015	5355.12	291825390	132370	76532.6	2987.1	132370		76532.6			1.35777	34.7876
Silver	0	0	349534	158.546			158.546	c		6400	69
Silver compounds	175045	79.3991	12728222	5773.43	3045.26	39.6995	5773.43		3045.26			0.620305	47.5822
Zinc compounds	397539261	180321	12414622620	5.63118e+06	2.81559e+06	90160.4	5.63118e+06		2.81559e+06	910000	76	9.90774	309.405
a Only reported in 1998 and 1999; b Not reported in meaningful amounts (either not reported or ≤160 lbs total annually) until 2017; c Only reported in 1998, 1999, 2000, 2014.
